# Supplementary material for: Targeted metabolomic and nutritional analyses of a variety of protein-rich whole-food sources
Source: Research Square preprint supplement (doi:10.21203/rs.3.rs-7694307/v1), 2025-10-27
Supplement: Supplementary file 1 [file 0236d2c10dfcca7ba6f25a8c.xlsx]

## Sheet: metabolite significant stats
Supplementary Material 1
Cooked	Significant?
Proline	YES	White vs Whole egg	white vs pork	white vs lentils	whole egg vs lentils	pork vs lentils	salmon vs lentils	mycoprotein vs lentils
Threonine	YES	White vs Whole egg	white vs pork	white vs salmon	white vs lentils	white vs mycoprotein	whole egg vs salmon	pork vs salmon	salmon vs lentils	salmon vs mycoprotein
Asparagine	YES	white vs lentils	whole egg vs lentils	pork vs lentils	salmon vs lentils	mycoprotein vs lentils
Heptadecanoic acid	YES	white vs salmon	white vs lentils	whole egg vs salmon	whole egg vs lentils	pork vs lentils	salmon vs lentils	salmon vs mycoprotein	mycoprotein vs lentils
Aradonic Acid	YES	Whites vs Salmon	whole egg vs salmon	pork vs salmon	mycoprotein vs salmon	lentils vs salmon
Myristic Acid	YES	Whites vs Salmon	whole egg vs salmon	pork vs salmon	mycoprotein vs salmon	lentils vs salmon
Valine	YES	White vs Whole egg	white vs salmon	white vs mycoprotein	white vs lentils	whole egg vs lentils	pork vs lentils	salmon vs lentils	mycoprotein vs lentils
Succinic Acid	YES	white vs pork	white vs salmon	white vs lentils	whole egg vs pork	whole egg vs salmon	pork vs salmon	salmon vs mycoprotein	salmon vs lentils
Lysine	YES	white vs salmon	white vs mycoprotein	white vs lentils	whole egg vs salmon	whole egg vs mycoprotein	pork vs salmon	pork vs mycoprotein	salmon vs lentils
Glutamic acid	YES	white vs salmon	white vs mycoprotein	white vs lentils	whole egg vs salmon	whole egg vs mycoprotein	pork vs salmon	pork vs mycoprotein	salmon vs lentils
Glycine	YES	white vs pork	white vs salmon	whole egg vs salmon	salmon vs mycoprotein	salmon vs lentils
Putrescine	YES	white vs mycoprotein	whole egg vs myco	pork vs myco	salmon vs mycoprotein
Glyceric Acid	YES	white vs pork	white vs salmon	white vslentils	whole egg vs pork	whole egg vs salmon	whole egg vs lentils	pork vs mco	salmon vs myco	myco vs lentils
Tyrosine	NO
Aspartic acid	YES	white vs lentils	whole egg vs lentils	pork vs lentils	salmon vs lentils	myco vs lentils
Fumaric Acid	YES	white vs pork	white vs lentils	whole egg vs pork	whole egg vs lentils	pork vs salmon	pork vs mycoprotein	salmon vs lentils	mycoprotein vs lentils
Beta-alanine	YES	white vs salmon	whole egg vs salmon	pork vs salmon	salmon vs myco	salmon vs lentils
Malic acid	YES	white vs lentils	whole egg vs lentils	pork vs lentils	salmon vs lentils	myco vs lentils
Citric acid	YES	white vs lentils	whole egg vs lentils	pork vs lentils	salmon vs lentils	mycoo v lentils
Threonic Acid	YES	white vs lentils	whole egg vs lentils	pork vs lentils	salmon vs lentils	mycoprotein vs lentils
Myo-Inositol	YES	white vs mycoprotein	whole egg vs mycoprotein	pork vs mycoprotein	mycoprotein vs lentils
Palmitic acid	YES	white vs lentils	whole egg vs lentils	pork vs lentils	salmon vs lentils
Linoleic acid	YES	white vs salmon	whole egg vs salmon	pork vs salmon	salmon vs lentils
Glucose-6-Phosphate	YES	white vs pork	white vs salmon	whole egg vs pork	whole egg vs salmon	pork vs mycoprotein	pork vs lentils	salmon vs mycoprotein	mycoprotein vs lentils
Raw
Proline	YES	white vs lentils	whole egg vs lentils	pork vs lentils	salmon vs lentils	mycoprotei vs lentils
Threonine	YES	white vs whole egg	white vs pork	white vs salmon	white vs mycoprotein	white vs lentils	whole egg vs salmon	whole egg vs lentils
Asparagine	YES	white vs lentils	whole egg vs lentils	pork vs lentils	salmon vs lentils	mycoprotein vs lentils
Heptadecanoic acid	NO
Aradonic Acid	YES	white vs pork	white vs salmon	whole egg vs salmon	pork vs salmon	pork vs lentils	salmon vs myco	salmon vs lentils
Myristic Acid	YES	white vs salmon	whole egg vs salmon	pork vs salmon	salmon vs myco	salmon vs lentils
Valine	YES	white vs whole egg	white vs pork	white vs salmon	white vs mycoprotein	white vs lentils	whole vs lentils	pork vs lentils	salmon vs lentils	mycoprotein vs lentils
Succinic Acid	YES	white vs pork	white vs pork	white vs salmon	white vs mycoprotein	white vs lentils	whole egg vs pork	whole egg vs salmon	pork vs salmon	salmon vs mycoprotein	salmon vs lentils
Lysine	YES	White vs Whole egg	white vs pork	white vs salmon	white vs mycoprotein	white vs lentils	whole egg vs salmon	whole egg vs mycop	pork vs salmon	pork vs mycoprotein	salmon vs myco	salmon vs lentils	myco vs lentils
Glutamic acid	YES	white vs lentils	whole egg vs lentils	salmon vs lentils
Aspartic acid	YES	white vs lentils	whole egg vs lentils	pork vs lentils	salmon vs lentils	mycoprptein vs letils
Glycine	YES	white vs salmon	white vs lentils	whole eggs vs salmon	whole egg s lentils	mycoprotein vs lentils
Putrescine	YES	white vs myco	whole egg vs myco	pork vs myco	salmon vs myco
Glyceric Acid	YES	white vs pork	white vs salmon	white vs lentils	whole egg vs pork	whole egg vs lentils	pork vs salmon	pork vs myco	salmon vs myc	salmon vs lentils	myco vs lentils
Tyrosine	YES	white vs myco	whole egg vs myco	pork vs myco	salmon vs myco	myco vs lentils
Fumaric Acid	YES	white vs pork	white vs lentils	whole egg vs pork	whole egg vs lentils	pork vs salmon	pork vs lentils	salmon vs lentils	mycoprotein vs lentils
Beta-alanine	YES	white vs pork	white vs salmon	white vs mycoprotein	white vs lentils	whole egg vs pork	whole egg vs salmon	whole egg vs mycop	whole egg vs lentils	pork vs salmon	pork vs lentils	salmon vs myco	salmon vs lentils	myco vs lentils
Malic acid	YES	white vs pork	white vs lentils	whole egg vs pork	whole egg vs lentils	pork vs lentils	salmon vs lentils	mycoprotein vs lentils
Citric acid	YES	white vs lentils	whole egg vs lentils	pork vs lentils	salmon vs lentils	mycoprotein vs lentils
Threonic Acid	YES	white vs lentils	whole egg vs lentils	pork vs lentils	salmon vs lentils	myco vs lentils
Myo-Inositol	YES	white vs lentils	whole egg vs lentils	pork vs lentils	salmon vs lentils	myco vs lentils
Palmitic acid	NO
Linoleic acid	YES	white vs myco	white vs lentils	whole egg vs lentils	pork vs lentils	salmon vs lentils
Glu-6-P	YES	white vs pork	white vs salmon	whole egg vs pork	whole egg vs salmon	pork vs salmon	pork vs mycoprotein	pork vs lentils	salmon vs myco
Effect of cooking
	Proline	Threonine	Asparagine	Heptadecanoic acid	Arachidonic Acid	Myristic Acid	Valine	Succinic Acid	Lysine	Glutamic acid	Aspartic acid	Glycine	Putrescine	Glyceric Acid	Tyrosine	Fumaric Acid	Beta-alanine	Malic acid	Citric acid	Threonic Acid	Myo-Inositol	Palmitic acid	Linoleic acid	Glu-6-P
Egg white		0.0051				0.0305					0.0389				0.0038	0.0478			0.0001		0.0002	0.0024
Whole egg									0.0066												0.0008	0.0122		0.0015
Pork					0.0204		0.0179				0.0005											0.0133	0.002	<0.0001
Salmon		0.0016															0.0139				0.0023			0.0162
Lentils	0.0129	0.001	0.001		0.0044		0.001	0.0004			0.002	0.0078	0.0022		0.014		0.0119							0.006
Mycoprotein	0.0013	0.0107			0.0146		0.0054	0.0099		0.0072	0.0224				0.0365	0.0033		0.0208		0.0452		0.001	0.0233
							Decreased with cooking
							Increased with cooking

## Sheet: Sheet1
Effect of cooking
	Proline	Threonine	Asparagine	Arachidonic Acid	Myristic Acid	Valine	Succinic Acid	Lysine	Glutamic acid	Aspartic acid	Glycine	Putrescine	Tyrosine	Fumaric Acid	Beta-alanine	Malic acid	Citric acid	Threonic Acid	Myo-Inositol	Palmitic acid	Linoleic acid	Glu-6-P
Egg white		0.0051			0.0305					0.0389			0.0038	0.0478			0.0001		0.0002	0.0024
Whole egg								0.0066											0.0008	0.0122		0.0015
Pork				0.0204		0.0179				0.0005										0.0133	0.002	<0.0001
Salmon		0.0016													0.0139				0.0023			0.0162
Lentils	0.0129	0.001	0.001	0.0044		0.001	0.0004			0.002	0.0078	0.0022	0.014		0.0119							0.006
Mycoprotein	0.0013	0.0107		0.0146		0.0054	0.0099		0.0072	0.0224			0.0365	0.0033		0.0208		0.0452		0.001	0.0233
		Decreased with cooking
		Increased with cooking
