# Supplementary material for: Targeted metabolomic and nutritional analyses of a variety of protein-rich whole-food sources
Source: Research Square preprint supplement (doi:10.21203/rs.3.rs-7694307/v1), 2025-10-27
Supplement: Supplementary file 2 [file 985f393a723542ec4ea8f0fd.xlsx]

## Sheet: Retention times
Sample	Proline [6.277]		Threonine [7.253]		Asparagine [10.416]		Heptadecanoic acid [13.806]		Aradonic Acid [15.256]		Myristic Acid [11.805]		Valine [6.537]		Succinic Acid [7.417]		Lysine [12.292]		Glutamic acid [9.286]		Glycine [7.38]		Putrescine [11.012]		Glyceric Acid [7.517]		Tyrosine [12.439]		Aspartic acid [9.189]		Fumaric Acid [7.732]		Beta-alanine [8.451]		Malic acid [8.901]		Citric acid [11.51]		Threonic Acid [9.465]		Myo-Inositol [13.427]		IntStd_MyristicAcid_d27 [11.657]		Palmitic acid [13.17]		Linoleic acid [14.253]		Glu-6-P [14.797]
Egg_1	6.28913	34907.3	7.25955	34962.7	10.437	65.5676	13.8166	71514.3	15.2622	99549.7	11.8185	97250.7	6.54183	11847	7.38758	265080	12.3003	17198	9.29137	13025.6	7.39097	29868.1	11.0503	249.108	7.52237	11129.2	12.4385	19644.1	9.19365	474.27	7.74138	2267.84	8.45573	750.571	8.90387	430.481	11.5152	1411.88	9.46658	205.763	13.4392	38003.7	11.6669	1.0964e+06	13.1764	26250.6	14.2614	13370.4	14.7803
Egg_1_ckd	6.29218	6118.39	7.25587	5899.35	10.4535	38.1814	13.8096	6300.48	15.2584	8260.96	11.8081	16585.4	6.53815	1563.91	7.38053	46721.1	12.2899	1757.8	9.28768	1877.04	7.3839	6412.47	11.0196	70.216	7.51868	3828.25	12.4314	1970.61	9.17985	27.1359	7.73433	379.052	8.4453	212.064	8.91028	40.6545	11.5048	418.221	9.473	6.56667	13.4254	26322.7	11.6598	253916	13.166	14103.4	14.251	2418.73	14.7733
Egg_2	6.29238	32619.2	7.25943	26782.8	10.4234	68.1027	13.8132	45001.3	15.262	134577	11.8184	59680	6.54173	9704.45	7.38748	250494	12.2969	15314	9.29125	12516.4	7.38748	36025.6	11.0367	225.776	7.52227	14703.1	12.4384	15497.7	9.19353	309.744	7.73792	1834.15	8.45898	719.423	8.90377	208.117	11.5118	2070.27	9.47322	42.4898	13.4324	29920.2	11.6668	1.19111e+06	13.1797	26831.5	14.2579	17956.7	14.7735
Egg_2_ckd	6.29555	5793.3	7.25587	4416.25	10.4131	39.5441	13.8096	5833.25	15.2517	45664.5	11.8081	22116.1	6.53817	1328.82	7.38053	62041.6	12.2899	1517.36	9.28432	3102.59	7.38053	7938.27	11.0331	83.8324	7.51532	12117.9	12.4314	2261.95	9.19333	25.8112	7.73433	303.059	8.45205	275.461	8.90357	92.7993	11.5048	530.81	9.45953	21.2212	13.4322	19667	11.6598	239674	13.1694	24111.1	14.2645	4015.45	14.7733
Egg_3	6.29518	31335.1	7.25885	27518.4	10.4262	42.1967	13.8058	35828.6	15.2581	187522	11.8178	63034.4	6.54115	10334.7	7.39027	215625	12.2996	15505	9.29068	13894.4	7.39027	29832.1	11.0361	136.909	7.50483	16646.7	12.4378	18149	9.19297	431.554	7.73733	1499.04	8.4584	589.099	8.90318	566.328	11.5112	2166.14	9.46588	243.95	13.4318	30441.3	11.6662	1.16878e+06	13.1623	8938.88	14.2641	16091.3	14.7796
Egg_3_ckd	6.2866	9425.02	7.25365	7886.66	10.4547	112.049	13.8074	4667.64	15.2529	25341.2	11.8092	12707.4	6.53932	2180.83	7.3817	68360.2	12.2911	2175.13	9.28547	2978.31	7.3817	8835.29	11.0275	122.271	7.51312	6647.49	12.4326	3248.85	9.18775	73.1897	7.73213	316.281	8.44983	175.35	8.89462	49.0224	11.5093	462.253	9.46405	45.0476	13.4232	23163	11.6576	236408	13.1705	19121.8	14.2521	5043.19	14.7711
ExtBuff_end	6.26507	77.7204	7.26918	381.131	10.4433	44.8184	13.8094	3717.97	15.2819	810.997	11.8046	6848.67	6.51778	14.893	7.37363	8471.09	12.2662	17.4773	9.28752	739.983	7.38037	1383.36	11.0363	95.9833	7.51515	7166.59	12.3538	1104.12	9.18643	11.9807	7.7308	237.489	8.44513	138.138	8.89665	53.3704	11.508	1120.18	9.46273	38.5621	13.4253	621.55	11.6563	196456	13.1692	11328.7	14.2508	2581.05	14.7663
ExtBuff_start	6.27382	36.9218	7.26782	75.0348	10.4183	33.6751	13.8485	0	15.2839	1975.69	11.82	3745.8	6.54	21.0635	7.38238	9638.96	12.2682	30.3888	9.28615	304.667	7.38238	1408.11	11.0147	2.2273	7.51717	8635.03	12.3558	1032.61	9.19855	5.62005	7.73282	256.478	8.45052	32.3332	8.90877	5.77483	11.5067	70.6844	9.46137	20.2	13.4239	302.433	11.6617	122893	13.1577	20.7093	14.2528	13.8208	14.7785
Lenitls_3	6.27672	95085.8	7.26398	34049.1	10.4212	27707.1	13.8042	51031.7	15.2632	59975.9	11.8061	45171.3	6.54292	27329	7.38867	678878	12.298	10807.5	9.28907	97632.9	7.38867	65044	11.0176	44865.5	7.52343	223945	12.4328	5820.15	9.19135	7210.9	7.73908	23649.8	8.4568	8579.1	8.90493	34619.6	11.5163	310383	9.47102	23734.6	13.4336	95136.2	11.6646	744466	13.1741	29104.5	14.2591	19875.4	14.7881
Lentils_1	6.27823	90408.2	7.26212	37845.8	10.4194	21312.2	13.8158	78586	15.2647	74003.5	11.8143	80036.4	6.54105	25602.4	7.3868	595075	12.2995	7480.82	9.29057	81350.1	7.3868	47975.4	11.0124	45350.9	7.52158	190885	12.4343	3223.76	9.19285	6062.1	7.73723	17710	8.45493	6413.79	8.90645	22586.1	11.5145	240649	9.47253	20525.1	13.4317	85769.5	11.6661	902036	13.1756	29816.8	14.2572	15814.3	14.7896
Lentils_1_raw	6.2773	45796.5	7.25445	13525.8	10.4184	21614.1	13.8081	10630.2	15.2604	5024.56	11.81	15788.2	6.53675	8244.66	7.3825	273353	12.2919	4921.01	9.28627	21630.9	7.38587	32681.9	11.0081	17763.1	7.52065	65174.4	12.43	3089.18	9.18855	11545.5	7.73292	3066.19	8.45063	2379.86	8.89877	6667.27	11.5101	49298.7	9.46485	5467.07	13.4274	38056.6	11.6584	155912	13.1713	7607.2	14.2529	4320.53	14.7651
Lentils_1_raw_end	6.27323	44654.5	7.25375	15435.2	10.4177	22209.9	13.8075	7091.81	15.2732	6587.37	11.806	6809.56	6.53942	10070.8	7.3818	317943	12.2912	5135.84	9.28557	20670.8	7.3818	35802.1	11.0074	18015.1	7.51658	57319.5	12.4293	2805.54	9.18448	13745.8	7.73223	1773.4	8.44993	2887.49	8.89808	6724.8	11.5128	88795.6	9.46753	4308	13.4267	32052	11.6577	160583	13.1672	20132.6	14.2522	10411.8	14.7644
Lentils_2	6.27755	94856.9	7.26145	28365.1	10.4221	24012.4	13.8253	59164.8	15.2573	53966.5	11.8069	55403.3	6.54373	27983.4	7.38948	607015	12.2989	12193.4	9.2899	79619.4	7.39285	53807.5	11.0151	41663	7.52427	172977	12.437	5717.12	9.19218	9114.97	7.73655	21473.1	8.45762	6511.97	8.90577	25830.3	11.5172	244799	9.47185	20246.7	13.4344	66628.9	11.6654	881596	13.175	26515.3	14.2566	22014.9	14.7889
Lentils_2_raw	6.28147	46580.8	7.25525	20325.6	10.4192	25959.7	13.8089	13035.5	15.2545	7959.96	11.8142	4844.95	6.53755	13536.1	7.3833	430305	12.2893	679.899	9.28707	35212.1	7.39003	34654.9	11.0123	27743.6	7.51807	70491	12.5016	3959.43	9.18935	19788.2	7.73372	3242.8	8.45143	3607.17	8.89957	8494.06	11.5109	100821	9.46565	6998.18	13.4282	37885.2	11.6592	245703	13.1721	30368.8	14.2504	11338.8	14.7693
Lentils_3_raw	6.27115	47637.9	7.25503	14205	10.4156	21637.1	13.8087	8071.53	15.2509	7026.22	11.8072	10343.6	6.53733	9983.48	7.38308	301514	12.2891	5177.36	9.28685	20664.8	7.38308	34595.3	11.0087	17239.9	7.51787	50661.8	12.4306	2318	9.18577	17840.8	7.73352	1970.83	8.45122	2759.91	8.89937	6693.35	11.5141	83939.1	9.46545	4437.92	13.4246	27147.4	11.6152	1.41336e+06	13.1719	21745.8	14.2535	9002.62	14.7691
Myco_1	6.30035	17760.2	7.26067	30144.6	10.4213	985.621	13.8177	77900.2	15.2666	62251.6	11.8196	138943	6.54295	11446.3	7.41567	666879	12.3116	17593.8	9.29248	35140.8	7.39208	55992.2	11.0177	112627	7.52348	29726.4	12.5003	27182.1	9.19477	709.162	7.73913	8099.22	8.45685	9351.35	8.90498	2329.25	11.513	2508.71	9.47107	492.123	13.4302	17898.8	11.6646	896455	13.1775	22130.8	14.2659	15838.5	14.7781
Myco_1_ckd	6.30408	2035.89	7.25428	6387.02	10.4115	172.412	13.808	5752.24	15.2704	4382.97	11.8065	20423.8	6.53657	1756.07	7.38232	75935.4	12.3052	4888.49	9.2861	5427.64	7.38568	11278.2	11.0113	33055.7	7.5171	14987.1	12.4939	2018.88	9.18838	94.3468	7.73275	1602.84	8.45045	1494.8	8.8986	466.769	11.5066	1012.24	9.46468	12.3851	13.4239	4890.62	11.6582	226705	13.1678	11872.2	14.2528	7085.55	14.7683
Myco_2	6.29345	17725.2	7.25713	34108.6	10.4211	2024.32	13.8109	48142.2	15.2631	110627	11.8195	101321	6.5428	13417.3	7.39528	622659	12.3148	18232.3	9.29233	46834.9	7.39192	56112.4	11.0175	124233	7.51997	32460.2	12.5001	24566.9	9.19123	1007.62	7.73898	7963.84	8.45332	10086.9	8.90147	2465.84	11.5128	4742.11	9.47092	294.369	13.4335	20615.8	11.6645	882739	13.1639	20611.8	14.2657	15529	14.7779
Myco_2_ckd	6.30042	2495.01	7.25398	6930.21	10.4179	226.032	13.8077	4461.75	15.2667	3024.27	11.8129	5389.07	6.53628	1463.33	7.38203	113903	12.3049	4117.95	9.2858	6204.23	7.3854	14372.1	11.0076	29240.5	7.5168	7475.08	12.4936	4171.8	9.18472	158.135	7.73245	1337.9	8.45017	1893.93	8.8983	290.966	11.5097	1141.67	9.46438	61.5666	13.4236	4827.96	11.6579	227592	13.1675	15143.2	14.2525	13671.9	14.7714
Myco_3	6.29353	21435.6	7.2572	37548.9	10.4178	1757.15	13.8076	19881.4	15.2632	152358	11.8162	88531.7	6.54287	11641.2	7.4122	756723	12.3115	20430.2	9.28903	48867.1	7.39873	50765.9	11.0142	164203	7.52003	39557.6	12.5002	44083.1	9.19468	1295.64	7.73905	8572.16	8.45675	13171.9	8.90153	2374.22	11.5129	5159.02	9.47098	394.92	13.4302	16815.8	11.6645	1.00149e+06	13.1741	23303.6	14.249	15104.3	14.778
Myco_3_ckd	6.30075	2973.85	7.25432	6606.07	10.4351	175.633	13.808	5200.31	15.2535	2716.68	11.8099	6209.73	6.5366	1619.61	7.38235	122112	12.3052	4996.95	9.28613	6065.87	7.38235	15089.3	11.0113	25026	7.51713	9053.58	12.4939	4481.82	9.18505	103.452	7.73278	1410.35	8.4505	2975.37	8.89527	319.17	11.5066	578.747	9.45798	41.7916	13.4239	5114.75	11.6583	233739	13.1712	14668.3	14.2494	13102.3	14.7717
Name	RT	Area	RT	Area	RT	Area	RT	Area	RT	Area	RT	Area	RT	Area	RT	Area	RT	Area	RT	Area	RT	Area	RT	Area	RT	Area	RT	Area	RT	Area	RT	Area	RT	Area	RT	Area	RT	Area	RT	Area	RT	Area	RT	Area	RT	Area	RT	Area	RT
Pork_1	6.28923	32746.9	7.25628	38451.7	10.4169	1071.08	13.8133	147387	15.2622	173363	11.8186	102891	6.54195	15854	7.39107	1.30834e+06	12.2971	9978.69	9.29147	41830.4	7.39107	104654	11.0167	1841.47	7.52247	362769	12.4386	6920.7	9.19038	1163.83	7.73812	13839.1	8.45583	17348.1	8.90735	15039.2	11.5153	3561.84	9.47005	467.251	13.4326	71908	11.667	1.12738e+06	13.1731	58476.4	14.2514	12151.2	14.7939
Pork_1_ckd	6.2898	7551.1	7.25685	9720.68	10.4107	349.212	13.8072	11011.6	15.2696	16585.8	11.8023	8519.54	6.53578	1891.26	7.38153	297020	12.2909	1763.75	9.2853	11101.8	7.38153	39603.6	11.0139	388.17	7.51632	96385.4	12.3549	10297.9	9.18758	163.265	7.73197	6208.73	8.45303	5225.68	8.89782	3035.11	11.5092	5128.52	9.46052	116.631	13.4163	13993.6	11.6575	234841	13.1703	18838	14.252	8861.44	14.7843
Pork_2	6.29228	33142.5	7.2627	29460.9	10.4098	1020.78	13.813	82268.3	15.2619	184705	11.8149	85446.4	6.54163	12483.8	7.39075	1.38585e+06	12.2967	9372.05	9.29115	51137.2	7.39075	147327	11.013	3003.06	7.51878	309394	12.4383	5772.86	9.19007	1166.67	7.7378	13534.7	8.46562	16938.3	8.90028	13453.4	11.515	4534.97	9.4731	408.924	13.4323	69078	11.6667	1.18302e+06	13.1863	9750.67	14.2477	16374.8	14.7936
Pork_2_ckd	6.29045	7154.33	7.25413	6632.77	10.4012	287.824	13.8078	8531.46	15.2533	22619.7	11.8064	10920.3	6.53642	1691.85	7.38217	307691	12.2916	1519.79	9.28595	8157.14	7.37543	28663.3	11.0078	245.803	7.51358	82699.3	12.4331	845.91	9.1815	77.0641	7.7326	5794.73	8.4503	6430.15	8.89845	2740.9	11.5064	3166.12	9.46453	85.1165	13.4203	34054.7	11.6581	269716	13.1676	24196.8	14.2492	12140.3	14.7884
Pork_3	6.29105	33213.9	7.26147	31420.3	10.4187	1370.48	13.8118	51824.7	15.2607	259928	11.8171	69173.7	6.54377	13475.9	7.38952	1.44893e+06	12.2989	10158.1	9.28992	47082.5	7.38952	130066	11.0151	1598.94	7.52093	334615	12.437	7080.32	9.1922	1240.98	7.73995	15933.9	8.45092	21297.1	8.90243	17289.9	11.5138	4739.66	9.4685	253.218	13.4344	64776	11.6654	1.07462e+06	13.175	36973.8	14.2532	16225.7	14.7923
Pork_3_ckd	6.3008	3361.88	7.25438	4536.65	10.4116	77.8422	13.8047	8764.04	15.2469	8976.07	11.8066	27507.6	6.53667	898.96	7.38242	178285	12.2918	872.034	9.28282	4860.42	7.38242	24918.7	11.0249	5.78081	7.51383	48128.9	12.4299	670.529	9.18173	11.3538	7.73285	3083.47	8.45055	3723.97	8.8987	1219.07	11.5067	2156.94	9.4614	10.9755	13.4206	21200.9	11.6583	253038	13.1713	24028.9	14.2495	8505.9	14.7852
Salmon_1	6.29335	37348.4	7.25703	42578.7	10.421	411.016	13.8175	202648	15.2664	700481	11.816	627843	6.5427	16868.5	7.39182	2.8863e+06	12.2911	29710.9	9.29222	18204.3	7.3817	84188.5	11.0174	12577.4	7.52322	201407	12.4393	6692.78	9.19113	829.337	7.73887	4073.38	8.45995	24669.5	8.90472	1601.05	11.5127	4056.36	9.47417	1194.52	13.4266	16037.8	11.6677	924181	13.1773	68652.6	14.269	14968.4	14.7946
Salmon_1_ckd	6.29623	5855.63	7.25655	19451.9	10.4003	20.7816	13.8069	16820.4	15.2591	218889	11.8088	205610	6.53885	3335.08	7.3846	804411	12.2906	6135.71	9.28837	5792.8	7.3846	41001.2	11.0102	3285.85	7.516	62182	12.4321	994.371	9.19065	104.409	7.73502	1286.04	8.45273	22097.8	8.90088	406.765	11.5089	1845.68	9.46695	364.341	13.4261	17483.5	11.6605	264787	13.1768	21961.3	14.2517	16782.4	14.7841
Salmon_2	6.2901	40019.5	7.25378	45392.1	10.4211	458.142	13.8142	95162	15.2631	932147	11.8161	562181	6.54282	20284.5	7.38857	3.27755e+06	12.298	33957	9.29235	26877.2	7.38857	272055	11.0142	12546.5	7.51998	210469	12.4361	8373.66	9.19127	1074.27	7.739	3210.74	8.4567	32525.6	8.90485	1757.54	11.5129	7947.64	9.47093	1351.38	13.4436	16368.2	11.6645	1.17277e+06	13.1639	8480.18	14.2489	15677	14.7914
Salmon_2_ckd	6.29918	4771.09	7.25612	17083.1	10.3999	67.1817	13.8064	9856.19	15.2587	260581	11.8083	170105	6.53842	2682.31	7.38417	727938	12.2902	5664.42	9.28457	4116.23	7.38417	37588.7	11.0098	1729.8	7.51557	42706.4	12.3542	5678.68	9.18348	100.906	7.73122	934.969	8.45567	14994.9	8.8937	342.701	11.5084	1216.21	9.46652	192.684	13.4257	11656.5	11.6601	252648	13.1797	21435.9	14.2512	16287.7	14.787
Salmon_3	6.2971	28721.3	7.26415	41408.8	10.4315	388.911	13.8145	69101.8	15.2634	1.26951e+06	11.813	724946	6.54308	12736	7.38883	2.6084e+06	12.2982	29312.5	9.28923	25523.6	7.38883	200974	11.0144	7444.96	7.52023	195241	12.4364	4910.64	9.19152	295.351	7.73927	2498.76	8.45697	28821.8	8.90175	1221.85	11.5131	6143.43	9.47118	1187.53	13.427	16977.8	11.6647	1.18936e+06	13.1709	42451.8	14.2492	18436.2	14.7917
Salmon_3_ckd	6.29987	3438.36	7.25343	13538.1	10.4309	120.352	13.8071	7547.21	15.2594	181057	11.809	123300	6.53573	2157.47	7.38485	640938	12.2909	6003	9.28525	4673.33	7.3781	43734.5	11.0105	1657.7	7.51288	40799.4	12.4256	1021.6	9.1909	103.174	7.73527	953.877	8.45298	18626.6	8.90113	275.815	11.5058	1209.13	9.4672	146.742	13.423	9540.89	11.6574	175210	13.177	21798.5	14.2485	19766.2	14.7843
White_1	6.2643	584.896	7.27178	4362.36	10.4425	304.805	13.812	28227.1	15.2777	6827.8	11.8172	80630.3	6.54397	866.535	7.38297	64214.8	12.2856	23.6063	9.29348	3360.84	7.38972	3759.08	11.0456	331.718	7.5245	23352.3	12.4979	6618.19	9.17555	242.6	7.74015	2039.31	8.46122	58.7141	8.90263	292.448	11.514	7029.57	9.47207	80.9369	13.4313	26601.4	11.6656	839723	13.1853	22274.7	14.2601	7004.26	14.7791
White_1_cked	6.28835	46.7099	7.26887	663.258	10.4463	27.2956	13.8091	4652.11	15.2479	778.221	11.811	4167.96	6.53095	139.381	7.38007	9905.23	12.276	20.0347	9.28385	500.649	7.38343	762.37	11.0158	34.8788	7.51822	6245.25	12.4175	96.1892	9.17602	7.72781	7.73387	229.771	8.45832	23.9864	8.90647	21.2493	11.501	216.365	9.47928	10.4801	13.4284	16866.5	11.6593	188805	13.1689	15237.1	14.2573	811.607	14.7694
White_2	6.26738	337.289	7.26813	4691.83	10.4018	351.681	13.8084	15100.7	15.2707	15691.9	11.817	54316.4	6.54032	1407.95	7.38607	63492.6	12.2685	91.7992	9.2932	3153.14	7.38943	3205.35	11.0386	596.445	7.52422	15772	12.4976	6208	9.19212	221.969	7.73987	1536.92	8.46093	116.738	8.90233	359.966	11.5137	6805.32	9.46505	88.757	13.4276	22065.5	11.6654	943159	13.1884	18931.4	14.2599	7845.41	14.7754
White_2_cked	6.26065	116.581	7.2715	601.639	10.4321	54.3307	13.805	4618.35	15.2505	2113.66	11.8102	8033.49	6.54032	74.9922	7.37933	9187.16	12.2853	72.2842	9.2831	523.377	7.37933	466.432	11.0285	66.4879	7.51748	3898.64	12.4269	127.271	9.18202	26.3633	7.73313	257.96	8.46432	37.257	8.87877	48.6088	11.507	179.855	9.4718	21.721	13.4242	18640.3	11.6586	183050	13.1682	21762.1	14.2666	2759.38	14.7687
White_3	6.2704	220.984	7.26777	4641.85	10.4284	74.9585	13.8046	11547.2	15.2636	32487.5	11.8166	64436.7	6.54333	1801.54	7.38233	68715.9	12.3153	234.424	9.29285	3802.38	7.38908	4388	11.0416	283.845	7.52385	11717.3	12.5006	10014.6	9.18503	92.6095	7.7395	1692.13	8.45385	232.576	8.90198	208.454	11.5134	7962.65	9.46807	37.5553	13.4306	24244.4	11.665	910813	13.1846	22865.5	14.2561	9876.87	14.7751
White_3_cked	6.25855	88.7276	7.2694	679.408	10.4266	52.7988	13.8063	4806.86	15.2484	3126	11.8115	1504.78	6.54158	164.981	7.3806	11142.1	12.2799	8.97183	9.28773	718.321	7.38397	679.093	11.0433	87.5713	7.51538	5317.45	12.4382	95.9734	9.19677	7.31739	7.7344	140.918	8.44873	38.2456	8.89688	23.8017	11.5083	189.958	9.4697	18.131	13.4255	17581.5	11.6599	164464	13.1661	17876	14.251	2430.71	14.7699
[truncated: 1 more columns]

## Sheet: Retention times (2)
Sample	Proline [6.277]	Threonine [7.253]	Asparagine [10.416]	Heptadecanoic acid [13.806]	Aradonic Acid [15.256]	Myristic Acid [11.805]	Valine [6.537]	Succinic Acid [7.417]	Lysine [12.292]	Glutamic acid [9.286]	Glycine [7.38]	Putrescine [11.012]	Glyceric Acid [7.517]	Tyrosine [12.439]	Aspartic acid [9.189]	Fumaric Acid [7.732]	Beta-alanine [8.451]	Malic acid [8.901]	Citric acid [11.51]	Threonic Acid [9.465]	Myo-Inositol [13.427]	IntStd_MyristicAcid_d27 [11.657]	Palmitic acid [13.17]	Linoleic acid [14.253]	Glu-6-P [14.797]
Egg_1	6.28913	7.25955	10.437	13.8166	15.2622	11.8185	6.54183	7.38758	12.3003	9.29137	7.39097	11.0503	7.52237	12.4385	9.19365	7.74138	8.45573	8.90387	11.5152	9.46658	13.4392	11.6669	13.1764	14.2614	14.7803
Egg_1_ckd	6.29218	7.25587	10.4535	13.8096	15.2584	11.8081	6.53815	7.38053	12.2899	9.28768	7.3839	11.0196	7.51868	12.4314	9.17985	7.73433	8.4453	8.91028	11.5048	9.473	13.4254	11.6598	13.166	14.251	14.7733
Egg_2	6.29238	7.25943	10.4234	13.8132	15.262	11.8184	6.54173	7.38748	12.2969	9.29125	7.38748	11.0367	7.52227	12.4384	9.19353	7.73792	8.45898	8.90377	11.5118	9.47322	13.4324	11.6668	13.1797	14.2579	14.7735
Egg_2_ckd	6.29555	7.25587	10.4131	13.8096	15.2517	11.8081	6.53817	7.38053	12.2899	9.28432	7.38053	11.0331	7.51532	12.4314	9.19333	7.73433	8.45205	8.90357	11.5048	9.45953	13.4322	11.6598	13.1694	14.2645	14.7733
Egg_3	6.29518	7.25885	10.4262	13.8058	15.2581	11.8178	6.54115	7.39027	12.2996	9.29068	7.39027	11.0361	7.50483	12.4378	9.19297	7.73733	8.4584	8.90318	11.5112	9.46588	13.4318	11.6662	13.1623	14.2641	14.7796
Egg_3_ckd	6.2866	7.25365	10.4547	13.8074	15.2529	11.8092	6.53932	7.3817	12.2911	9.28547	7.3817	11.0275	7.51312	12.4326	9.18775	7.73213	8.44983	8.89462	11.5093	9.46405	13.4232	11.6576	13.1705	14.2521	14.7711
ExtBuff_end	6.26507	7.26918	10.4433	13.8094	15.2819	11.8046	6.51778	7.37363	12.2662	9.28752	7.38037	11.0363	7.51515	12.3538	9.18643	7.7308	8.44513	8.89665	11.508	9.46273	13.4253	11.6563	13.1692	14.2508	14.7663
ExtBuff_start	6.27382	7.26782	10.4183	13.8485	15.2839	11.82	6.54	7.38238	12.2682	9.28615	7.38238	11.0147	7.51717	12.3558	9.19855	7.73282	8.45052	8.90877	11.5067	9.46137	13.4239	11.6617	13.1577	14.2528	14.7785
Lenitls_3	6.27672	7.26398	10.4212	13.8042	15.2632	11.8061	6.54292	7.38867	12.298	9.28907	7.38867	11.0176	7.52343	12.4328	9.19135	7.73908	8.4568	8.90493	11.5163	9.47102	13.4336	11.6646	13.1741	14.2591	14.7881
Lentils_1	6.27823	7.26212	10.4194	13.8158	15.2647	11.8143	6.54105	7.3868	12.2995	9.29057	7.3868	11.0124	7.52158	12.4343	9.19285	7.73723	8.45493	8.90645	11.5145	9.47253	13.4317	11.6661	13.1756	14.2572	14.7896
Lentils_1_raw	6.2773	7.25445	10.4184	13.8081	15.2604	11.81	6.53675	7.3825	12.2919	9.28627	7.38587	11.0081	7.52065	12.43	9.18855	7.73292	8.45063	8.89877	11.5101	9.46485	13.4274	11.6584	13.1713	14.2529	14.7651
Lentils_1_raw_end	6.27323	7.25375	10.4177	13.8075	15.2732	11.806	6.53942	7.3818	12.2912	9.28557	7.3818	11.0074	7.51658	12.4293	9.18448	7.73223	8.44993	8.89808	11.5128	9.46753	13.4267	11.6577	13.1672	14.2522	14.7644
Lentils_2	6.27755	7.26145	10.4221	13.8253	15.2573	11.8069	6.54373	7.38948	12.2989	9.2899	7.39285	11.0151	7.52427	12.437	9.19218	7.73655	8.45762	8.90577	11.5172	9.47185	13.4344	11.6654	13.175	14.2566	14.7889
Lentils_2_raw	6.28147	7.25525	10.4192	13.8089	15.2545	11.8142	6.53755	7.3833	12.2893	9.28707	7.39003	11.0123	7.51807	12.5016	9.18935	7.73372	8.45143	8.89957	11.5109	9.46565	13.4282	11.6592	13.1721	14.2504	14.7693
Lentils_3_raw	6.27115	7.25503	10.4156	13.8087	15.2509	11.8072	6.53733	7.38308	12.2891	9.28685	7.38308	11.0087	7.51787	12.4306	9.18577	7.73352	8.45122	8.89937	11.5141	9.46545	13.4246	11.6152	13.1719	14.2535	14.7691
Myco_1	6.30035	7.26067	10.4213	13.8177	15.2666	11.8196	6.54295	7.41567	12.3116	9.29248	7.39208	11.0177	7.52348	12.5003	9.19477	7.73913	8.45685	8.90498	11.513	9.47107	13.4302	11.6646	13.1775	14.2659	14.7781
Myco_1_ckd	6.30408	7.25428	10.4115	13.808	15.2704	11.8065	6.53657	7.38232	12.3052	9.2861	7.38568	11.0113	7.5171	12.4939	9.18838	7.73275	8.45045	8.8986	11.5066	9.46468	13.4239	11.6582	13.1678	14.2528	14.7683
Myco_2	6.29345	7.25713	10.4211	13.8109	15.2631	11.8195	6.5428	7.39528	12.3148	9.29233	7.39192	11.0175	7.51997	12.5001	9.19123	7.73898	8.45332	8.90147	11.5128	9.47092	13.4335	11.6645	13.1639	14.2657	14.7779
Myco_2_ckd	6.30042	7.25398	10.4179	13.8077	15.2667	11.8129	6.53628	7.38203	12.3049	9.2858	7.3854	11.0076	7.5168	12.4936	9.18472	7.73245	8.45017	8.8983	11.5097	9.46438	13.4236	11.6579	13.1675	14.2525	14.7714
Myco_3	6.29353	7.2572	10.4178	13.8076	15.2632	11.8162	6.54287	7.4122	12.3115	9.28903	7.39873	11.0142	7.52003	12.5002	9.19468	7.73905	8.45675	8.90153	11.5129	9.47098	13.4302	11.6645	13.1741	14.249	14.778
Myco_3_ckd	6.30075	7.25432	10.4351	13.808	15.2535	11.8099	6.5366	7.38235	12.3052	9.28613	7.38235	11.0113	7.51713	12.4939	9.18505	7.73278	8.4505	8.89527	11.5066	9.45798	13.4239	11.6583	13.1712	14.2494	14.7717
Name	RT	RT	RT	RT	RT	RT	RT	RT	RT	RT	RT	RT	RT	RT	RT	RT	RT	RT	RT	RT	RT	RT	RT	RT	RT
Pork_1	6.28923	7.25628	10.4169	13.8133	15.2622	11.8186	6.54195	7.39107	12.2971	9.29147	7.39107	11.0167	7.52247	12.4386	9.19038	7.73812	8.45583	8.90735	11.5153	9.47005	13.4326	11.667	13.1731	14.2514	14.7939
Pork_1_ckd	6.2898	7.25685	10.4107	13.8072	15.2696	11.8023	6.53578	7.38153	12.2909	9.2853	7.38153	11.0139	7.51632	12.3549	9.18758	7.73197	8.45303	8.89782	11.5092	9.46052	13.4163	11.6575	13.1703	14.252	14.7843
Pork_2	6.29228	7.2627	10.4098	13.813	15.2619	11.8149	6.54163	7.39075	12.2967	9.29115	7.39075	11.013	7.51878	12.4383	9.19007	7.7378	8.46562	8.90028	11.515	9.4731	13.4323	11.6667	13.1863	14.2477	14.7936
Pork_2_ckd	6.29045	7.25413	10.4012	13.8078	15.2533	11.8064	6.53642	7.38217	12.2916	9.28595	7.37543	11.0078	7.51358	12.4331	9.1815	7.7326	8.4503	8.89845	11.5064	9.46453	13.4203	11.6581	13.1676	14.2492	14.7884
Pork_3	6.29105	7.26147	10.4187	13.8118	15.2607	11.8171	6.54377	7.38952	12.2989	9.28992	7.38952	11.0151	7.52093	12.437	9.1922	7.73995	8.45092	8.90243	11.5138	9.4685	13.4344	11.6654	13.175	14.2532	14.7923
Pork_3_ckd	6.3008	7.25438	10.4116	13.8047	15.2469	11.8066	6.53667	7.38242	12.2918	9.28282	7.38242	11.0249	7.51383	12.4299	9.18173	7.73285	8.45055	8.8987	11.5067	9.4614	13.4206	11.6583	13.1713	14.2495	14.7852
Salmon_1	6.29335	7.25703	10.421	13.8175	15.2664	11.816	6.5427	7.39182	12.2911	9.29222	7.3817	11.0174	7.52322	12.4393	9.19113	7.73887	8.45995	8.90472	11.5127	9.47417	13.4266	11.6677	13.1773	14.269	14.7946
Salmon_1_ckd	6.29623	7.25655	10.4003	13.8069	15.2591	11.8088	6.53885	7.3846	12.2906	9.28837	7.3846	11.0102	7.516	12.4321	9.19065	7.73502	8.45273	8.90088	11.5089	9.46695	13.4261	11.6605	13.1768	14.2517	14.7841
Salmon_2	6.2901	7.25378	10.4211	13.8142	15.2631	11.8161	6.54282	7.38857	12.298	9.29235	7.38857	11.0142	7.51998	12.4361	9.19127	7.739	8.4567	8.90485	11.5129	9.47093	13.4436	11.6645	13.1639	14.2489	14.7914
Salmon_2_ckd	6.29918	7.25612	10.3999	13.8064	15.2587	11.8083	6.53842	7.38417	12.2902	9.28457	7.38417	11.0098	7.51557	12.3542	9.18348	7.73122	8.45567	8.8937	11.5084	9.46652	13.4257	11.6601	13.1797	14.2512	14.787
Salmon_3	6.2971	7.26415	10.4315	13.8145	15.2634	11.813	6.54308	7.38883	12.2982	9.28923	7.38883	11.0144	7.52023	12.4364	9.19152	7.73927	8.45697	8.90175	11.5131	9.47118	13.427	11.6647	13.1709	14.2492	14.7917
Salmon_3_ckd	6.29987	7.25343	10.4309	13.8071	15.2594	11.809	6.53573	7.38485	12.2909	9.28525	7.3781	11.0105	7.51288	12.4256	9.1909	7.73527	8.45298	8.90113	11.5058	9.4672	13.423	11.6574	13.177	14.2485	14.7843
White_1	6.2643	7.27178	10.4425	13.812	15.2777	11.8172	6.54397	7.38297	12.2856	9.29348	7.38972	11.0456	7.5245	12.4979	9.17555	7.74015	8.46122	8.90263	11.514	9.47207	13.4313	11.6656	13.1853	14.2601	14.7791
White_1_cked	6.28835	7.26887	10.4463	13.8091	15.2479	11.811	6.53095	7.38007	12.276	9.28385	7.38343	11.0158	7.51822	12.4175	9.17602	7.73387	8.45832	8.90647	11.501	9.47928	13.4284	11.6593	13.1689	14.2573	14.7694
White_2	6.26738	7.26813	10.4018	13.8084	15.2707	11.817	6.54032	7.38607	12.2685	9.2932	7.38943	11.0386	7.52422	12.4976	9.19212	7.73987	8.46093	8.90233	11.5137	9.46505	13.4276	11.6654	13.1884	14.2599	14.7754
White_2_cked	6.26065	7.2715	10.4321	13.805	15.2505	11.8102	6.54032	7.37933	12.2853	9.2831	7.37933	11.0285	7.51748	12.4269	9.18202	7.73313	8.46432	8.87877	11.507	9.4718	13.4242	11.6586	13.1682	14.2666	14.7687
White_3	6.2704	7.26777	10.4284	13.8046	15.2636	11.8166	6.54333	7.38233	12.3153	9.29285	7.38908	11.0416	7.52385	12.5006	9.18503	7.7395	8.45385	8.90198	11.5134	9.46807	13.4306	11.665	13.1846	14.2561	14.7751
White_3_cked	6.25855	7.2694	10.4266	13.8063	15.2484	11.8115	6.54158	7.3806	12.2799	9.28773	7.38397	11.0433	7.51538	12.4382	9.19677	7.7344	8.44873	8.89688	11.5083	9.4697	13.4255	11.6599	13.1661	14.251	14.7699
